# Supplementary material
Source: publisher figshare collection journal article supplement (https://tandf.figshare.com/ndownloader/files/39658274)
Supplement: Supplementary file 1 [file 39658274]

**Appendix D: Table of inventive principles and schemes**

**Table** Inventive principles and schemes

| **Inventive principles** | **Explanation** | **Scheme** |
| --- | --- | --- |
| 2 Taking out-separation | ①Isolate "interfering" parts or properties in an object.  ②Extract only the necessary parts and attributes of an object. | 1 The sensors are activated in a time-sharing manner in a prescribed order to reduce the mutual influence of the echo signals. |
| 18 Mechanical vibration | ①To vibrate or oscillate an object  ②Increase vibration frequency  ③Use the resonant frequency of an object  ④Replacing mechanical vibration with other forms of vibration | 2 Use sensors with different frequencies so that the sensor can only recognize its own signal with a unique frequency |
| 27 Cheap short-living objects | Use low-cost, less-durable objects instead of high-cost, durable objects | / |
| 35 Parameter changes | ①Change the physical state of the system  ②Change concentration or density  ③Change flexibility  ④Change temperature or volume | / |
| 1 Segmentation | ①Break down an object into separate parts  ②Make an object easy to disassemble  ③Increase the degree of separation | / |
| 10 Preliminary action | ①Pre-use objects partially or fully to produce desired changes  ②Pre-position objects so that they can be used immediately from the most convenient location | 3 The mechanical structure is installed, so that the distance between the sensor and the workpiece is within the optimal measurement range for each measurement. |
| 28 Mechanics substitution/another sense | ①Replace mechanical systems with light, sound, and heat systems.  ②Use electricity, magnetism, and electromagnetic fields to interact with objects  ③Convert the static field into a dynamic field, from disordered field to ordered field, so that the field changes in time.  ④Combined field active particles use field. | / |
| 34 Discarding and recovering | ①When a component completes its function or becomes useless, discard it or modify it in the work.  ②Old parts should be repaired during work. | 4 In each detection, when the sensor receives a signal, it stops working to reduce the interference to other sensors. |
